# Supplementary material for: Optical studies of stimuli-responsive organic crystals differing in the position and nature of functional groups
Source: Royal Society of Chemistry journal article supplement (doi:10.1039/d5ma01080b), 2025-12-16
Supplement: d5ma01080b1.pdf [file d5ma01080b1.pdf]

# Optical studies of stimuli-responsive organic crystals differing in the position and nature of functional groups

Sumeera Farooq,<sup>a</sup> Ishtiyaz Ahmad,<sup>a</sup> and Aijaz A. Dar <sup>\*a</sup>

Keywords: Crystal engineering, functional thin films, structure-property correlation, thermochromism, mechanochromism

Corresponding authors: [aijazku2015@gmail.com](mailto:aijazku2015@gmail.com)/[daraijaz@uok.edu.in](mailto:daraijaz@uok.edu.in), Orcid: 0000-0002-6180-274X

## Electronic Supporting information

- Figure S-1:** <sup>1</sup>H NMR spectra of **1** recorded in DMSO-d<sub>6</sub> solvent (500MHz).  
**Figure S-2:** <sup>1</sup>H NMR spectra of **2** recorded in DMSO-d<sub>6</sub> solvent (500MHz).  
**Figure S-3:** <sup>1</sup>H NMR spectra of **3** recorded in DMSO-d<sub>6</sub> solvent (500MHz).  
**Figure S-4:** HR-MS spectra of **1**.  
**Figure S-5:** HR-MS spectra of **2**.  
**Figure S-6:** HR-MS spectra of **3**.  
**Figure S-7:** PXRD spectra of **2** and **3**.  
**Figure S-8:** Solution phase Absorption spectra of **1-3** in H<sub>2</sub>O (10<sup>-3</sup> M conc.).  
**Figure S-9:** Tauc plots of **1-3** depicting the bandgaps.  
**Figure S-10:** Luminescence spectra of **3** displaying changes in luminescence upon heating.  
**Figure S-11:** Emission spectra of thin films of **1**.  
**Figure S-12:** Emission spectra of thin films of **2**.  
**Figure S-13:** Emission spectra of thin films of **3**.  
**Figure S-14:** Emission spectra of crystal, powder and thin film of **1**.  
**Figure S-15:** Emission spectra of crystal, powder and thin film of **2**.  
**Figure S-16:** Emission spectra of crystal, powder and thin film of **3**.  
**Figure S-17:** Crystal morphologies of thin films **1-3**.  
**Figure S-18:** PXRD of thin film in ETOH of **1**.  
**Figure S-19:** PXRD of thin film in ETOH of **2**.  
**Figure S-20:** PXRD of thin film in ETOH of **3**.  
**Figure S-21:** PXRD of thin films in ETOH, MeOH, ACN, acetic acid and Hexane of **1**.  
**Figure S-22:** Fluorescence spectra obtained by titration of different concentrations of methanolic solution of Zn (II) ions against 10<sup>-4</sup>M methanolic solution of **2** and its linear fit for calculation of binding constant.  
**Figure S-23:** Job (continuous variation) plot by mixing equimolar total concentrations of compound **2** and Zn(II) while varying the mole fraction of Zn(II) and **2** and keeping the total concentration constant, for determining the stoichiometry of metal ligand complex.  
**Figure S-24:** Tetrahedral metal complex of schiff base **2** with Zn(II).  
**Figure S-25:** d<sub>norm</sub>, Shape-index, and Curvedness surface of molecular solid **1**.  
**Figure S-26:** d<sub>norm</sub>, Shape-index, and Curvedness surface of molecular solid **2**.  
**Figure S-27:** d<sub>norm</sub>, Shape-index, and Curvedness surface of molecular solid **3**.  
**Figure S-28:** Columb energy, dispersion energy, and total energy calculations of **1**.  
**Figure S-29:** Columb energy, dispersion energy, and total energy calculations of **2**.  
**Figure S-30:** Columb energy, dispersion energy, and total energy calculations of **3**.  
**Figure S-31:** Mechanism of Keto-Enol tautomerism.  
**Figure S-32:** FTIR of **3** and **3H**.  
**Figure S-33:** TGA of **3** and **3H**.

**Figure S-34:** Thermochromic photographs under different conditions in **3H**.

**Table S-1:** Crystallographic Table of **1-3**

**Table S-2:** The calculated energy levels for **1-3**

**Table S-3:** LODs values of some selective zinc sensors.

**Table S-4:** Interaction and lattice energy calculation of **1**.

**Table S-5:** Interaction and lattice energy calculation of **2**.

**Table S-6:** Interaction and lattice energy calculation of **3**.

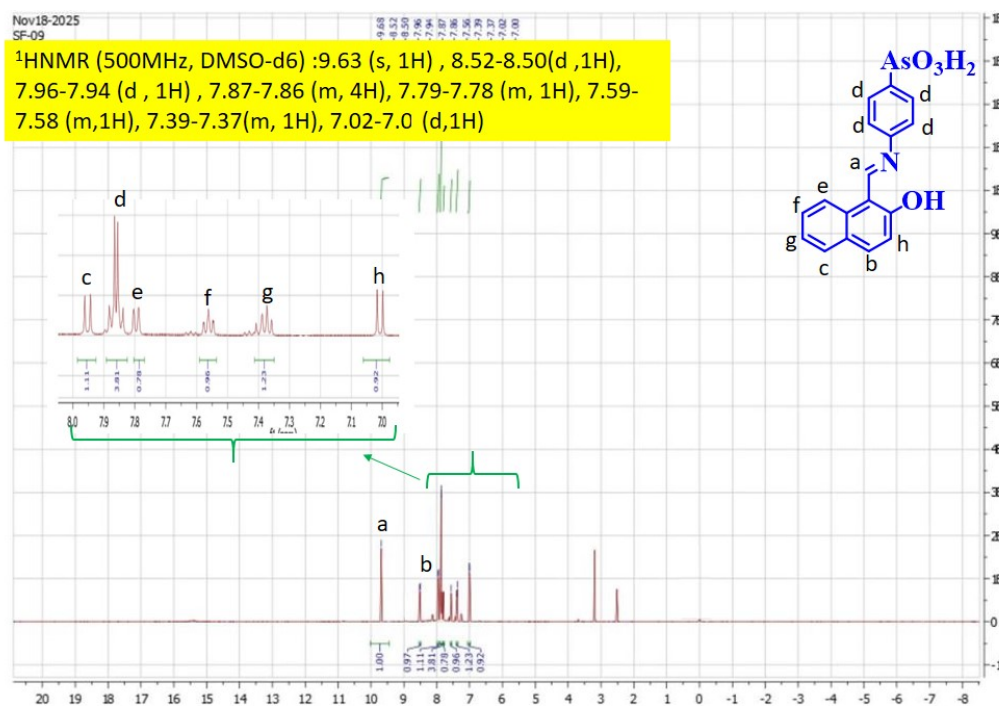

**Figure S-1:** <sup>1</sup>H NMR spectra of **1** recorded in DMSO-d<sub>6</sub> solvent (500MHz).

<sup>1</sup>H NMR (500MHz, DMSO-d<sub>6</sub>) : 12.8 (s, 1H) , 9.4 (s, 1H), 8.20-8.18 (d, 1H) , 7.96-7.95 (d, 2H), 7.95-7.91 (d, 1H), 7.90-7.86 (d, 1H), 7.61-7.60 (m, 2H), 7.59-7.58 (m, 1H), 7.40-7.38 (m, 1H), 7.22-7.20 (d, 1H)

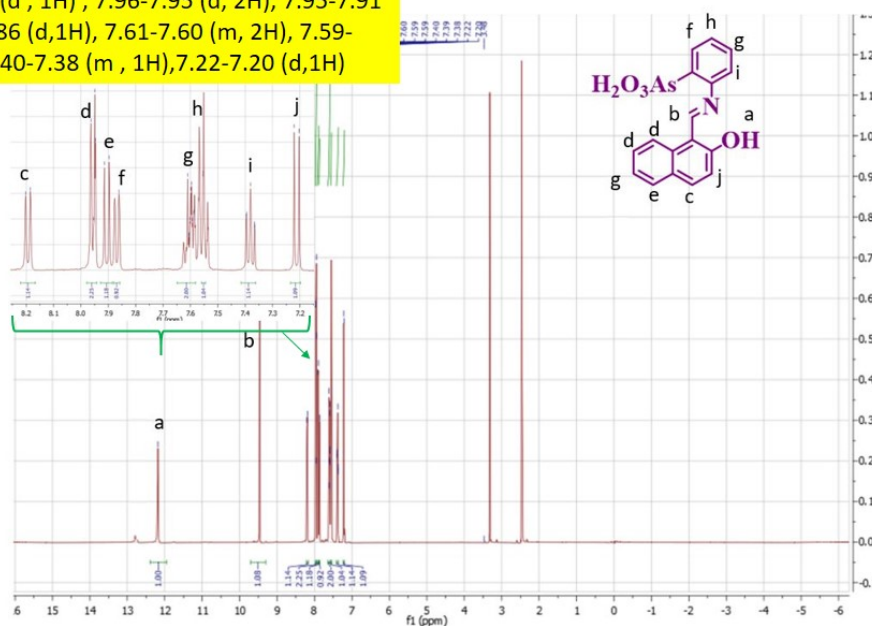

**Figure S-2:** <sup>1</sup>H NMR spectra of **2** recorded in DMSO-d<sub>6</sub> solvent (500MHz).

<sup>1</sup>H NMR (500MHz, DMSO-d<sub>6</sub>) : 12.50 (s, 1H) , 12.38 (s, 1H), 9.44 (d, 1H) , 8.81-8.80 (d, 2H), 8.29-8.28 (d, 1H), 7.93-7.91 (d, 1H), 7.86-7.85 (m, 3H), 7.60-7.5 (m, 1H), 7.40-7.38 (m, 1H), 7.22-7.21 (d, 1H)

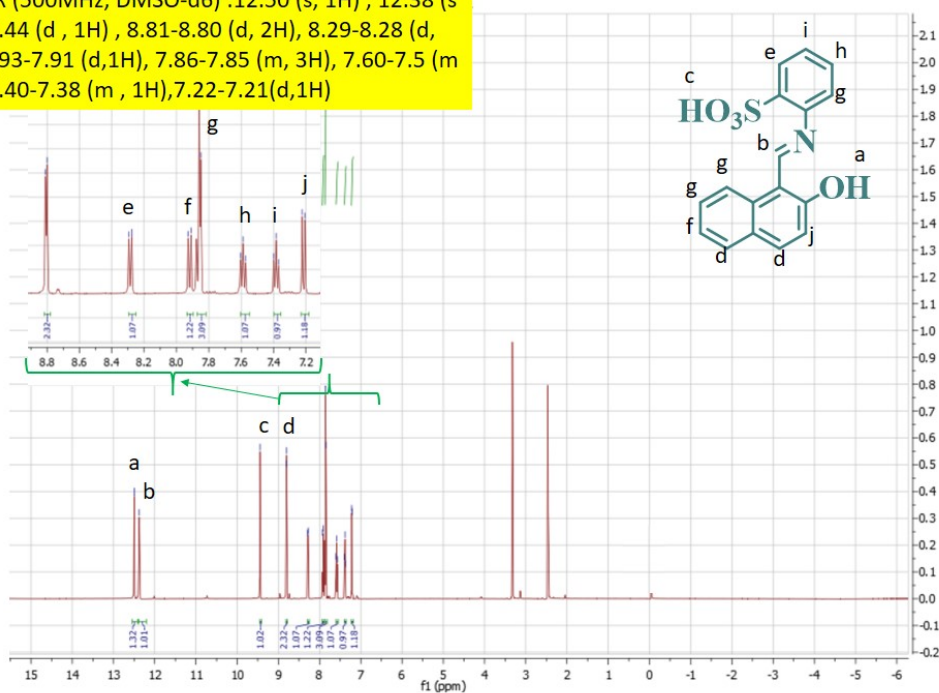

**Figure S-3:** <sup>1</sup>H NMR spectra of **3** recorded in DMSO-d<sub>6</sub> solvent (500MHz).

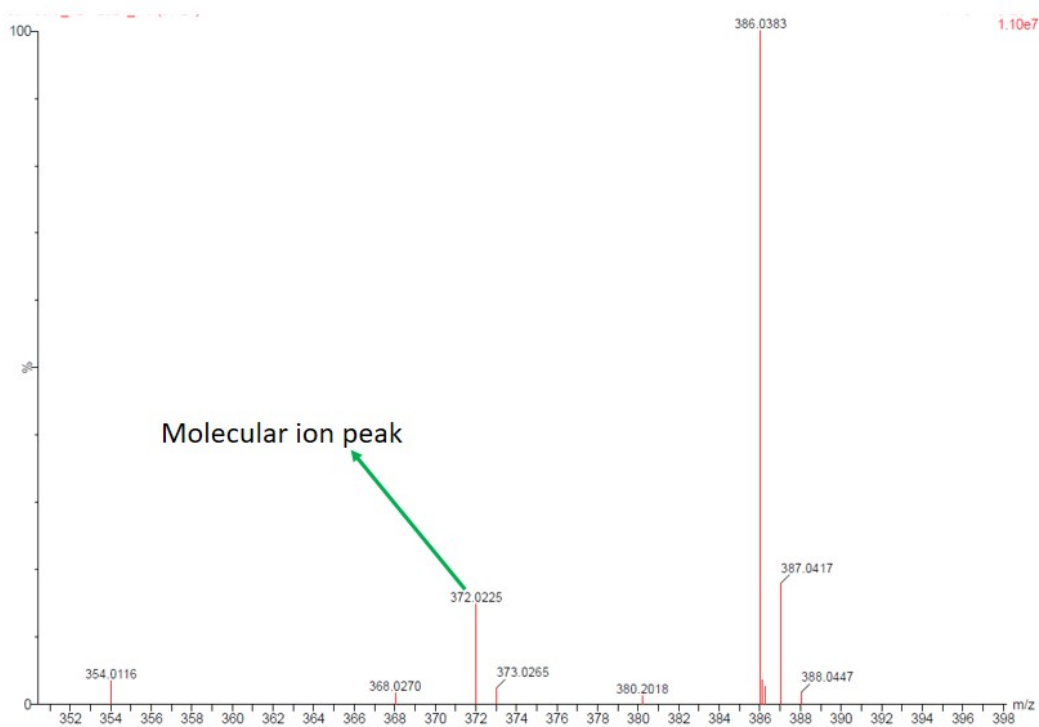

**Figure S-4: HR-MS spectra of 1**

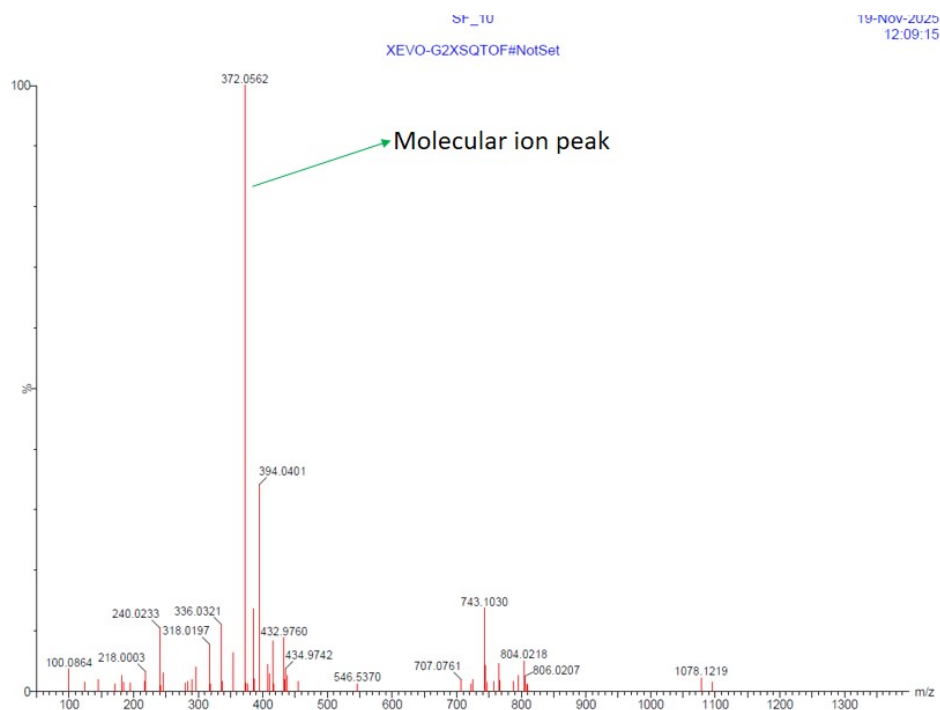

**Figure S-5: HR-MS spectra of 2**

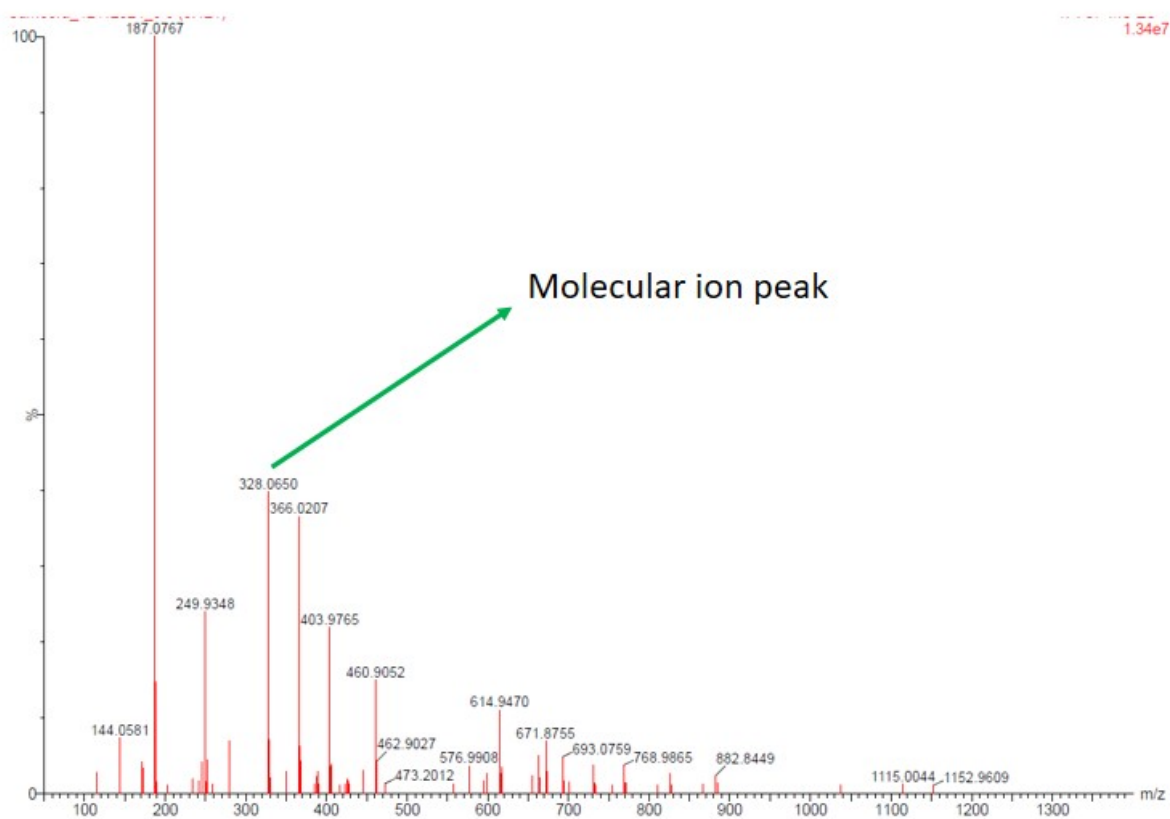

Figure S-6: HR-MS spectra of 3

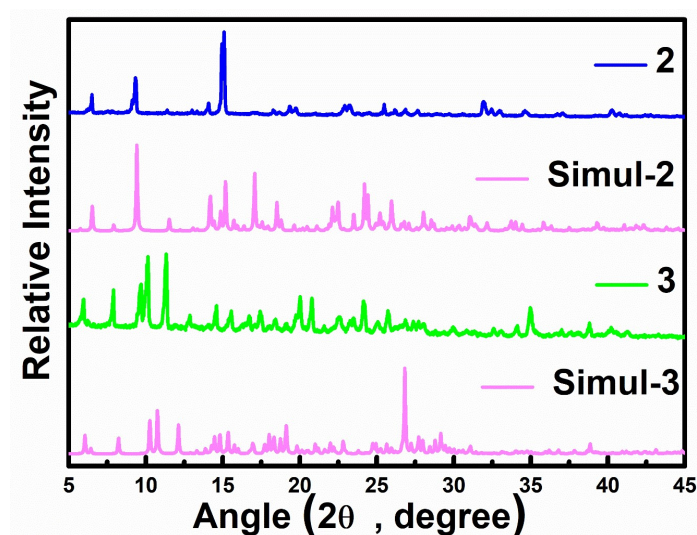

Figure S-7: PXRD spectra of 2 and 3.

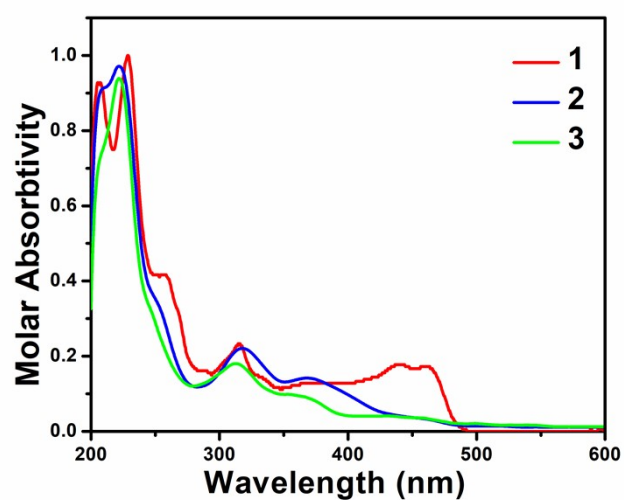

**Figure S-8-:** Solution phase Absorption spectra of **1-3** in MeOH ( $10^{-5}$ M conc.).

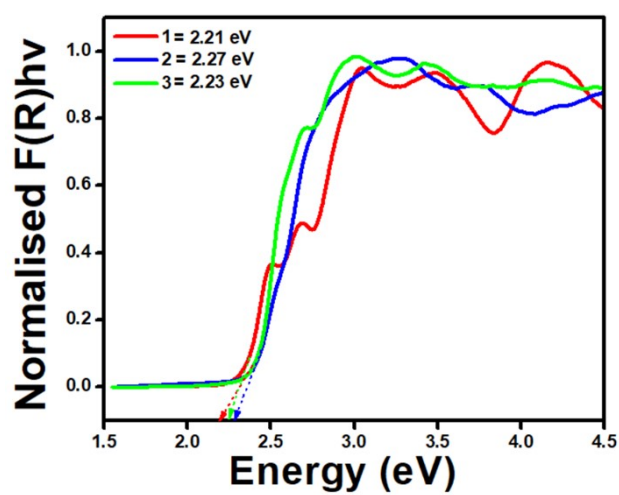

**Figure S-9:** Tauc plots of **1-3** depicting the band gaps.

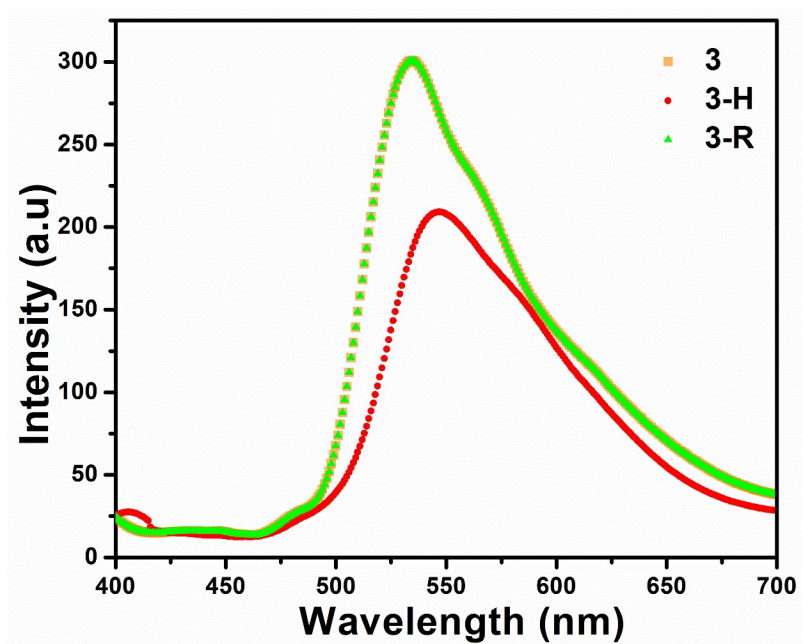

Figure S-10: Luminescence spectra of **3** displaying changes in luminescence upon heating.

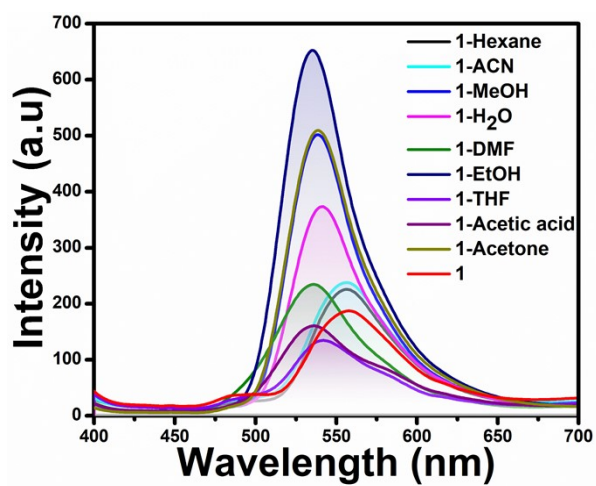

Figure S-11: Emission spectra of thin films of **1**.



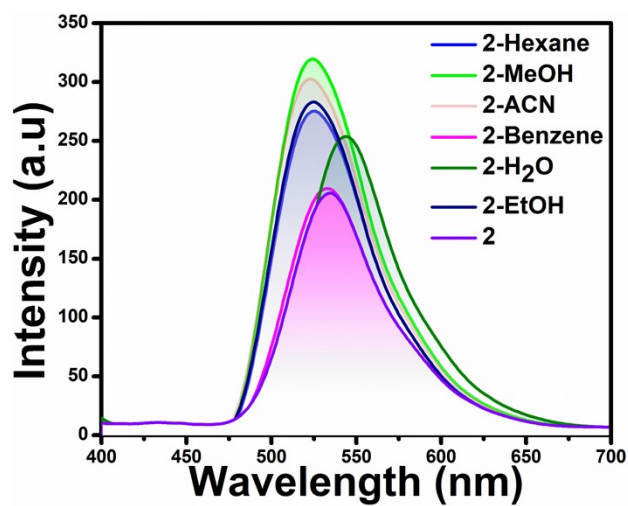

Figure S-12: Emission spectra of thin films of **2**.

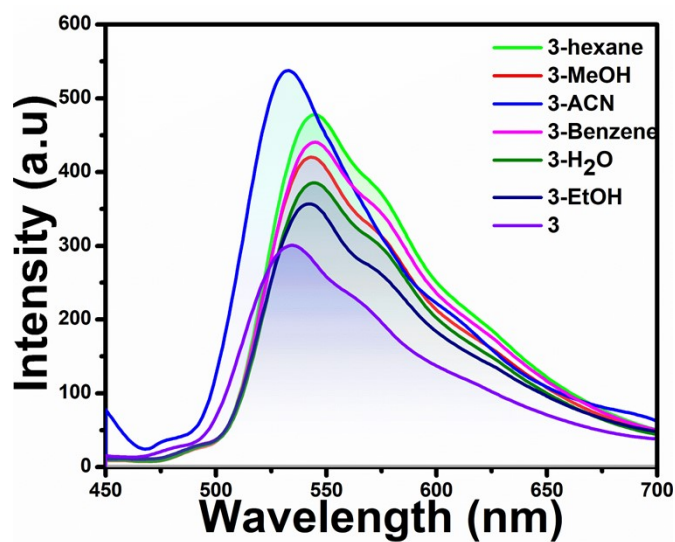

Figure S-13: Emission spectra of thin films of **3**.

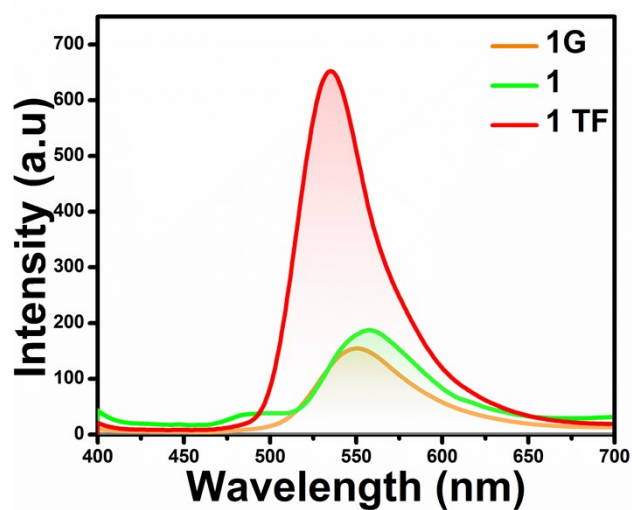

Figure S-14: Emission spectra of crystal, powder and thin film of **1**.



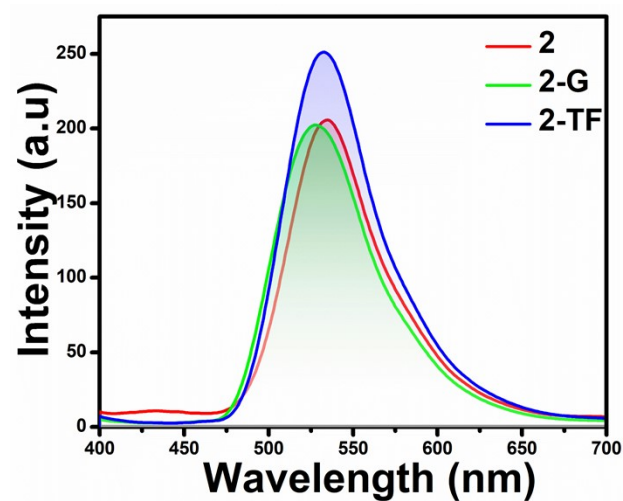

Figure S-15: Emission spectra of crystal, powder and thin film of 2.

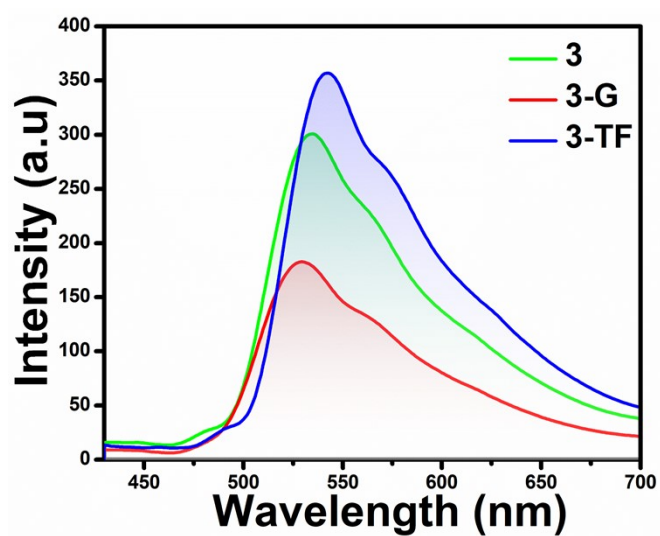

Figure S-16: Emission spectra of crystal, powder and thin film of 3.

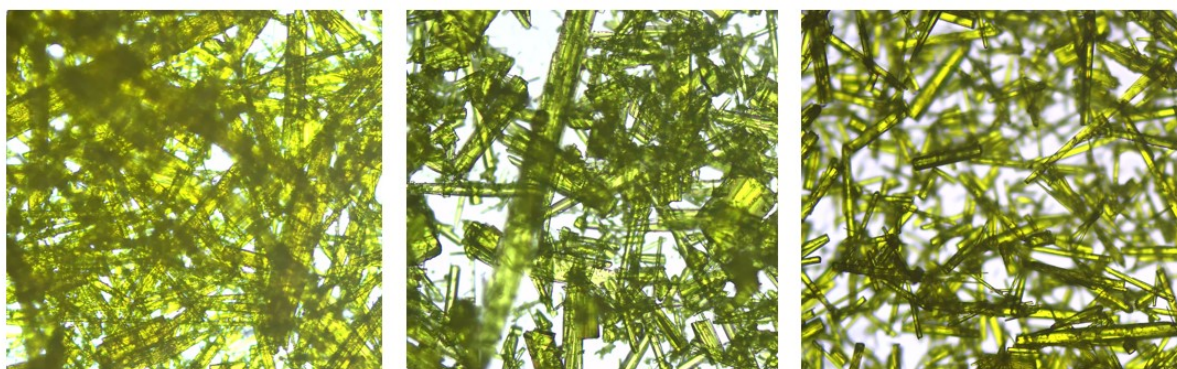

TF- 01

TF-02

TF-03

Figure S-17: Crystal morphologies of thin films 1- 3.

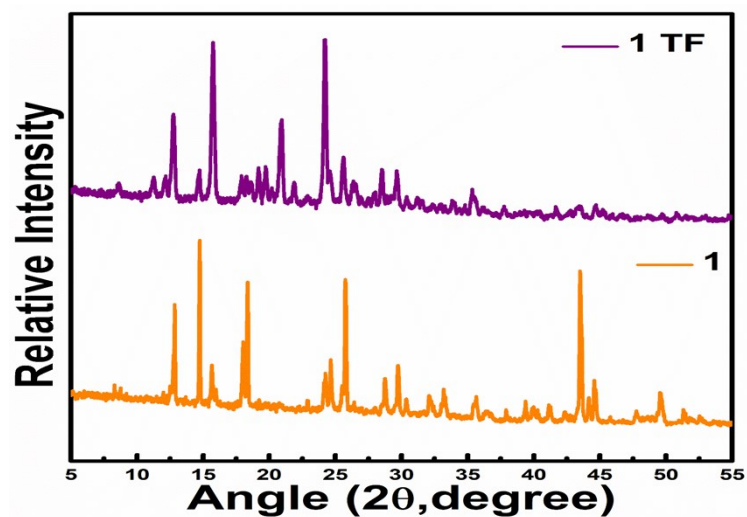

Figure S-18: Pxrd of thin film in EtOH of 1.

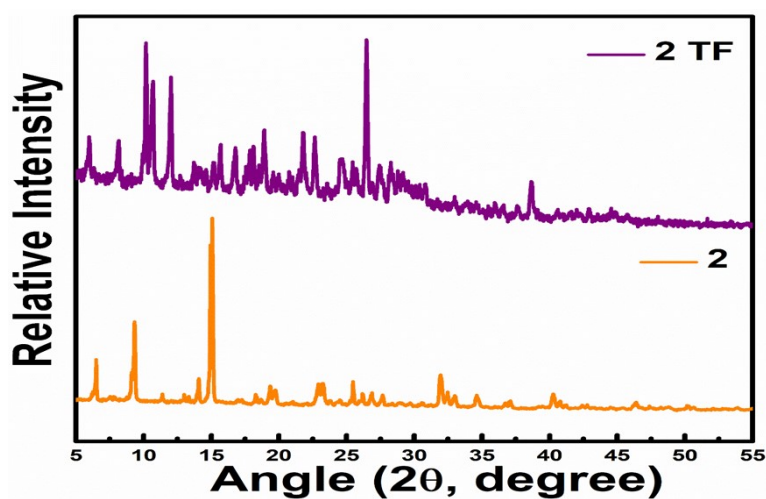

Figure S-19: Pxrd of thin film in EtOH of 2.

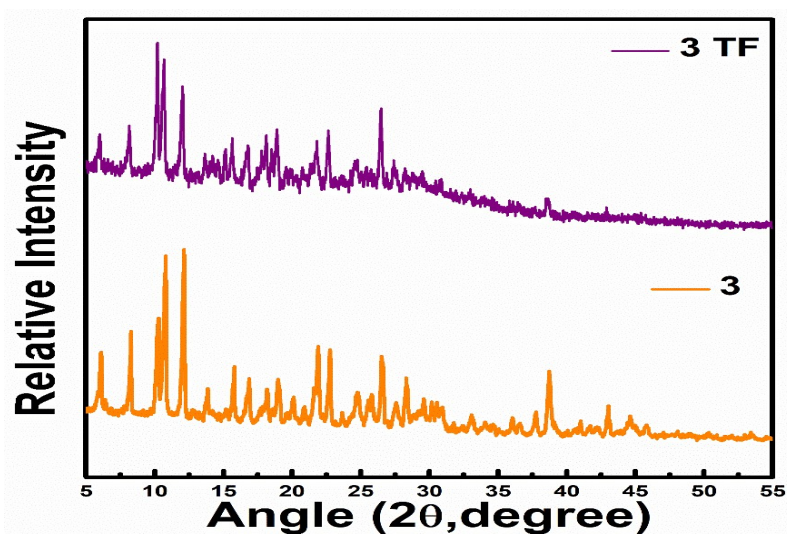

Figure S-20: Pxrd of thin film in EtOH of 3.

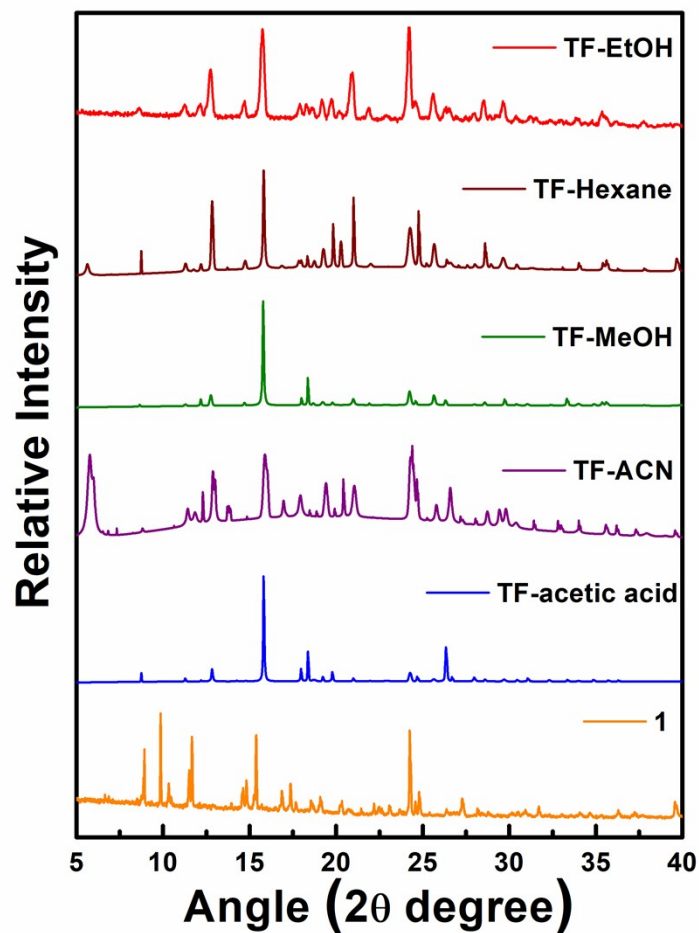

**Figure S-21:** PXRD of thin films in ETOH, MeOH, ACN, acetic acid and Hexane of **1**.

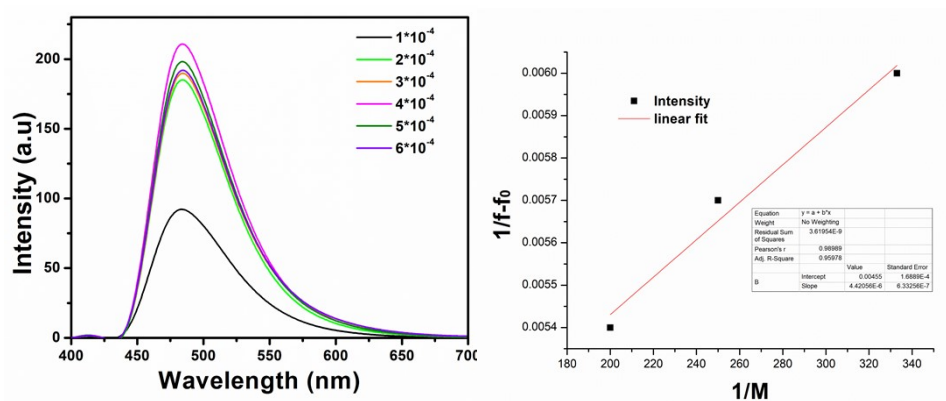

**Figure S-22:** Fluorescence spectra obtained by titration of different concentrations of methanolic solution of Zn (II) ions against  $10^{-4}$ M methanolic solution of **2** and its linear fit for calculation of binding constant.

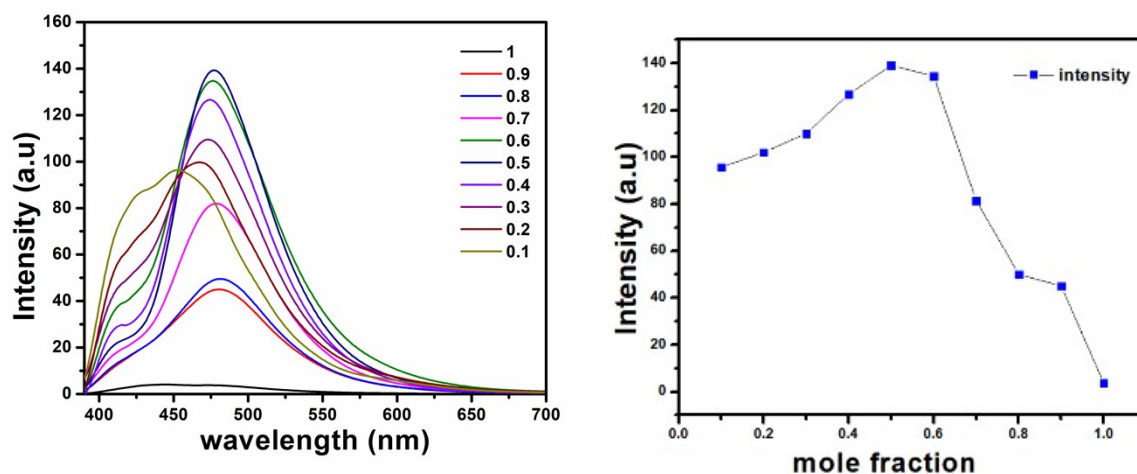

**Figure S-23:** Job (continuous variation) plot by mixing equimolar total concentrations of compound 2 and Zn(II) while varying the mole fraction of Zn(II) and 2 and keeping the total concentration constant, for determining the stichometry of metal ligand complex.

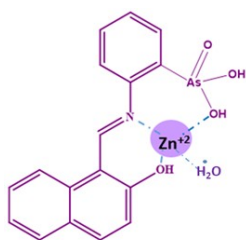

**Figure S-24:** Tetrahedral metal complex of schiff base 2 with zn(II).

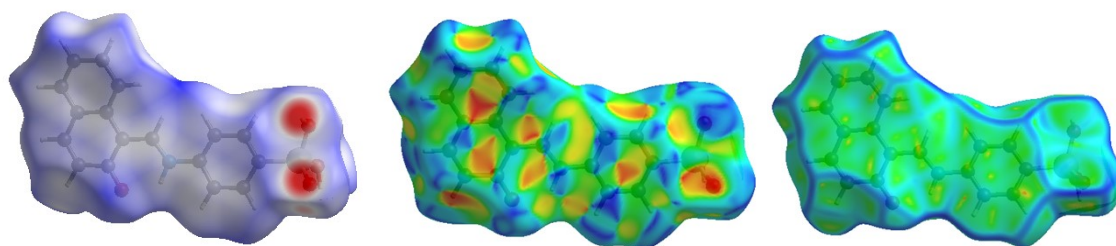

**Figure S-25:**  $d_{\text{norm}}$ , Shape-index, and Curvedness surface of molecular solid 1.



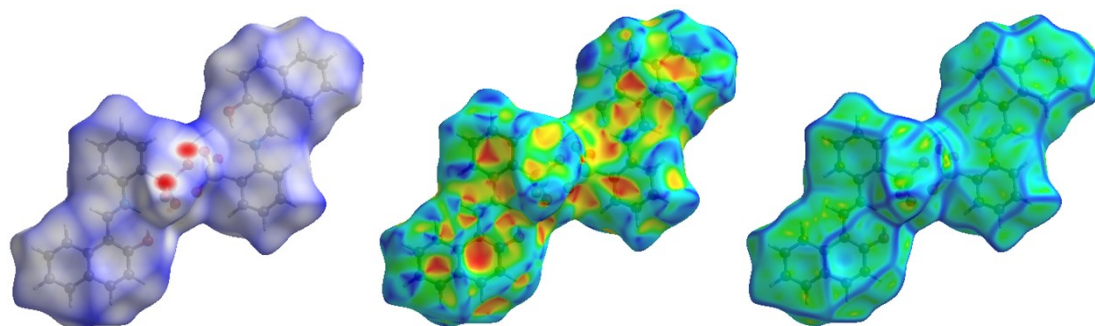

**Figure S-26:**  $d_{\text{norm}}$ , Shape-index, and Curvedness surface of molecular solid **2**.

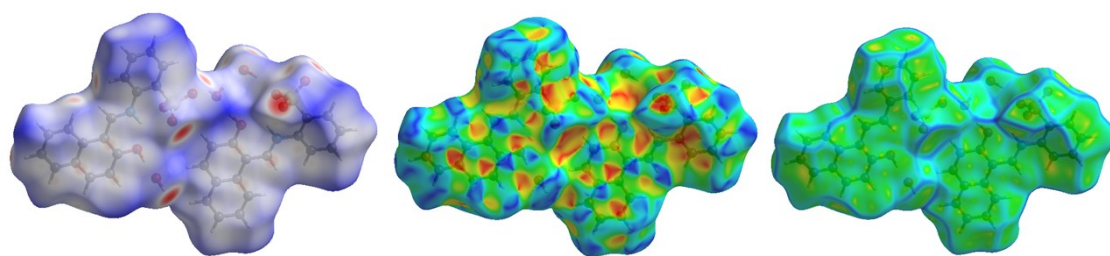

**Figure S-27:**  $d_{\text{norm}}$ , Shape-index, and Curvedness surface of molecular solid **3**.

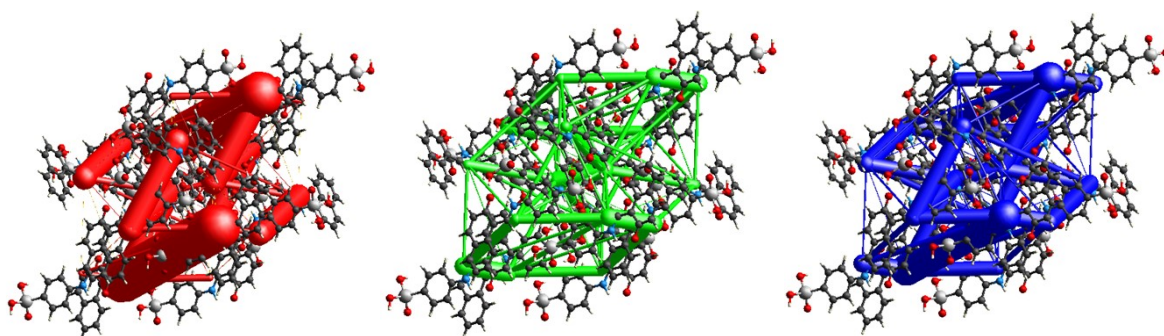

**Figure S-28:** Columb energy, dispersion energy, and total energy calculations of **1**.

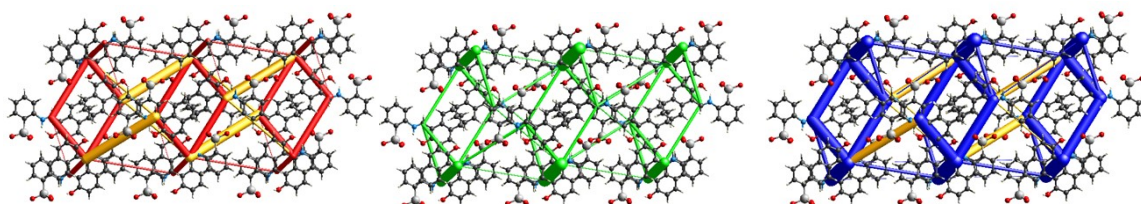

**Figure S-29:** Columb energy, dispersion energy, and total energy calculations of **2**.

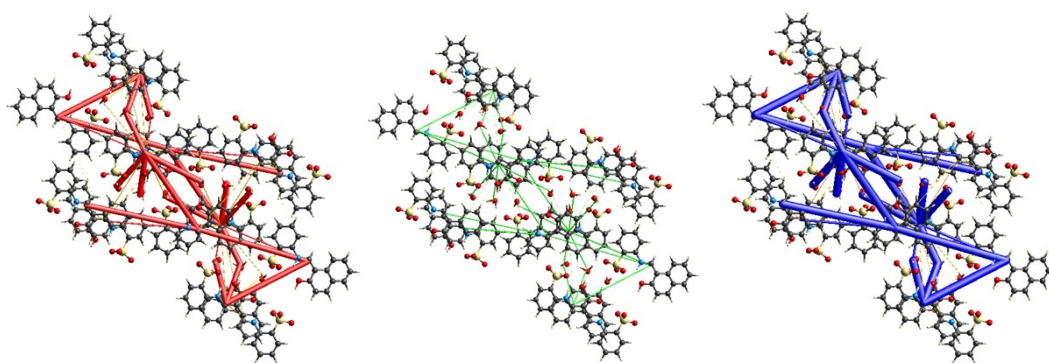

**Figure S-30:** Coulomb energy, dispersion energy, and total energy calculations of **3**.

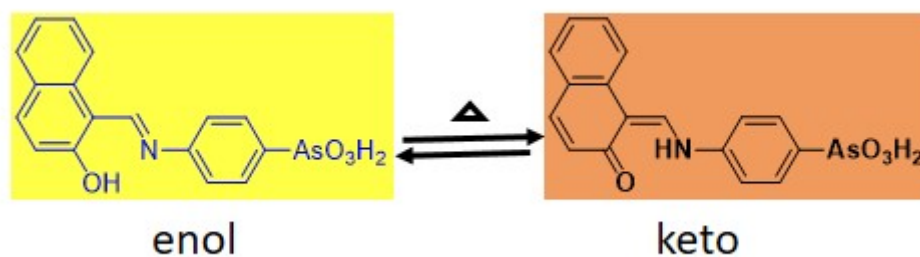

**Figure S-31:** Mechanism of Keto-Enol tautomerism.

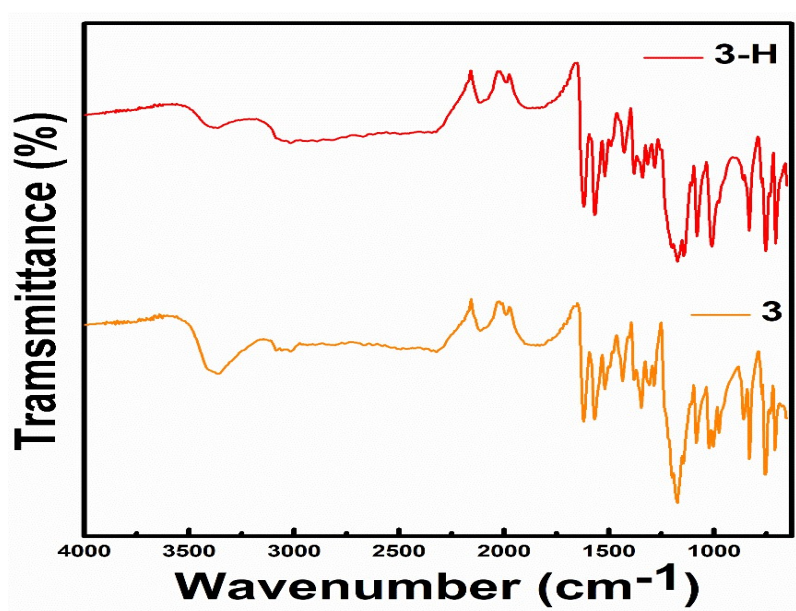

**Figure S-32:** FTIR of **3** and **3H**.

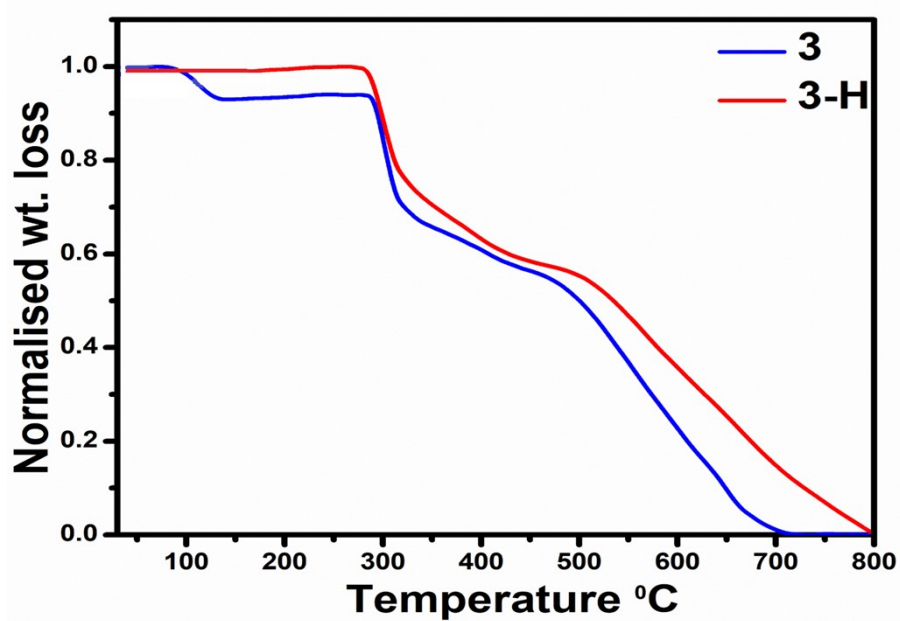

Figure S-33: TGA of 3 and 3H.

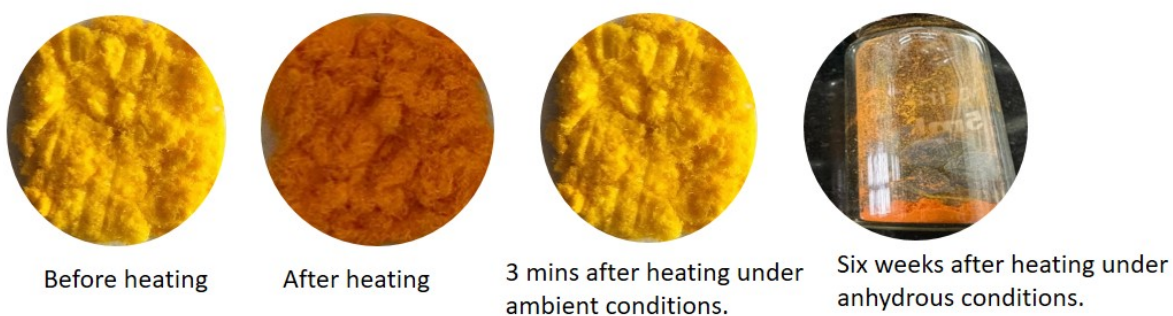

Figure S-34: Thermochromic photographs under different conditions in 3H.

Table S-1: Crystallographic Table of 1-3

| Reaction code/Compound s | AI-322(1)       | AI-318(2)       | SF-12 (3)                       |
|--------------------------|-----------------|-----------------|---------------------------------|
| CCDC No.                 | 2444241         | 2444242         | 2444243                         |
| Empirical formula        | C17 H14 As N O4 | C17 H14 As N O4 | 2(C17 H13 N O4 S), H3 O,2(H2 O) |
| Fw                       | 371.21          | 371.21          | 708.73                          |
| Temp [K]                 | 150             | 149             | 150                             |
| Crystal system           | Monoclinic      | Monoclinic      | Monoclinic                      |
| Space group              | P 21/n          | P 21/c          | P 21/c                          |
| a, [Å]                   | 11.5840(11)     | 15.570(13)      | 6.6530(8)                       |
| b, [Å]                   | 9.4113(9)       | 7.045(5)        | 17.223(2)                       |
| c, [Å]                   | 14.1627(13)     | 27.48(2)        | 27.491(4)                       |
| α, [°]                   | 90              | 90              | 90                              |
| β, [°]                   | 105.590(3)      | 99.94(2)        | 93.369(3)                       |



|                                         |           |         |           |
|-----------------------------------------|-----------|---------|-----------|
| $\gamma$ , [°]                          | 90        | 90      | 90        |
| $V$ , [Å <sup>3</sup> ]                 | 1487.2(2) | 2969(4) | 3144.6(7) |
| $Z$                                     | 4         | 8       | 4         |
| $D(\text{calcd})$ [Mg/cm <sup>3</sup> ] | 1.658     | 1.661   | 1.497     |
| $\mu$ [mm <sup>-1</sup> ]               | 2.306     | 2.310   | 0.238     |
| $\Theta$ range [°]                      | 28.346    | 24.988  | 28.458    |
| Reflns collected                        | 3719      | 5167    | 7880      |
| Indep. Reflns                           | 3242      | 3524    | 3387      |
| GOF                                     | 0.986     | 1.140   | 0.948     |
| $R1(I_o > 2\sigma(I_o))$                | 0.0258    | 0.1026  | 0.0678    |
| $wR2(\text{all data})$                  | 0.0584    | 0.2796  | 0.1894    |

**Table S-2:** The calculated energy levels for **1-3**

|   | E(HOMO)/eV | E(LUMO)/eV | $\Delta E$ /eV | $E_g$ /eV |
|---|------------|------------|----------------|-----------|
| 1 | -5.27      | -3.55      | 1.72           | 2.21      |
| 2 | -5.22      | -3.29      | 1.93           | 2.27      |
| 3 | -4.94      | -3.19      | 1.75           | 2.23      |

$\Delta E$  is the bandgap obtained from cyclic voltammetry.  $E_g$  is the optical band gap calculated UV-vis absorption spectroscopy.

**Table S-3:** LODs values of some selective zinc sensors.

| S.NO | Sensor Type                                                | LOD                            | reference |
|------|------------------------------------------------------------|--------------------------------|-----------|
| 1    | (2-((3-morpholinopropyl)amino)-N-(quinolin-8-yl)acetamide) | $0.29 \times 10^{-6} \text{M}$ | 1         |
| 2    | Benzothiazole-based (BIPP)                                 | $2.36 \times 10^{-8} \text{M}$ | 2         |
| 3    | Salen-based probe                                          | $2.18 \times 10^{-6} \text{M}$ | 3         |
| 4    | shiff base (2)                                             | $4.9 \times 10^{-6} \text{M}$  | This work |
| 5    | 2-(quinolin-2-yl)quinazolin-4(3H)-one                      | $8.82 \times 10^{-7} \text{M}$ | 4         |
| 6    | Pyrene-malonohydrazide derivative                          | $5.1 \times 10^{-9} \text{M}$  | 5         |
| 7    | zinc sensor based on quinoline                             | $0.63 \times 10^{-6} \text{M}$ | 6         |

**Table S-4:** Interaction and lattice energy calculation of **1**.

|  | N | Symop                 | R     | Electron Density | E_ele  | E_pol | E_dis | E_rep | E_tot  |
|--|---|-----------------------|-------|------------------|--------|-------|-------|-------|--------|
|  | 1 | -x, -y, -z            | 10.89 | HF/3-21G         | -205.2 | -78.4 | -24.8 | 177.7 | -138.4 |
|  | 2 | -x+1/2, y+1/2, -z+1/2 | 7.73  | HF/3-21G         | -109.5 | -36.4 | -23.6 | 95.9  | -78.7  |
|  | 1 | -x, -y, -z            | 5.89  | HF/3-21G         | -25.1  | -5.9  | -86.0 | 35.0  | -78.6  |
|  | 0 | -x, -y, -z            | 5.87  | HF/3-21G         | -31.9  | -12.1 | -47.3 | 24.6  | -63.1  |
|  | 1 | x+1/2, -y+1/2, z+1/2  | 11.21 | HF/3-21G         | 0.6    | -2.1  | -3.9  | 0.2   | -4.1   |
|  | 2 | x+1/2, -y+1/2, z+1/2  | 9.04  | HF/3-21G         | 1.4    | -1.6  | -5.3  | 0.6   | -3.9   |
|  | 2 | x+1/2, -y+1/2, z+1/2  | 9.28  | HF/3-21G         | -2.1   | -1.6  | -11.9 | 5.2   | -9.7   |
|  | 1 | x+1/2, -y+1/2, z+1/2  | 11.41 | HF/3-21G         | -1.4   | -1.1  | -16.1 | 7.7   | -10.4  |
|  | 0 | -x, -y, -z            | 11.30 | HF/3-21G         | 1.4    | -3.0  | -52.6 | 25.0  | -27.6  |
|  | 2 | -x+1/2, y+1/2, -z+1/2 | 9.31  | HF/3-21G         | 1.0    | -2.1  | -14.9 | 7.0   | -8.0   |
|  | 2 | -x+1/2, y+1/2, -z+1/2 | 12.25 | HF/3-21G         | -1.0   | -0.5  | -2.5  | 0.0   | -3.6   |
|  | 1 | x, y, z               | 14.93 | HF/3-21G         | -13.6  | -2.4  | -15.0 | 0.0   | -28.9  |

**Table S-5:** Interaction and lattice energy calculation of **2**.

|  | N | Symop             | R     | Electron Density | E_ele | E_pol | E_dis | E_rep | E_tot |
|--|---|-------------------|-------|------------------|-------|-------|-------|-------|-------|
|  | 0 | -                 | 13.76 | HF/3-21G         | 0.0   | -10.7 | 0.0   | 0.0   | -7.0  |
|  | 0 | -                 | 8.11  | HF/3-21G         | -4.6  | -19.9 | -25.4 | 16.6  | -27.0 |
|  | 0 | -x, -y, -z        | 6.36  | HF/3-21G         | -35.8 | -20.2 | -96.5 | 48.6  | -97.2 |
|  | 0 | x, -y+1/2, z+1/2  | 13.74 | HF/3-21G         | 0.0   | -2.5  | 0.0   | 0.0   | -1.6  |
|  | 0 | -x, -y, -z        | 6.52  | HF/3-21G         | -34.6 | -25.0 | -75.4 | 36.2  | -90.1 |
|  | 0 | -x, y+1/2, -z+1/2 | 11.04 | HF/3-21G         | -13.7 | -1.5  | -8.6  | 1.5   | -21.3 |
|  | 0 | -                 | 8.43  | HF/3-21G         | -37.1 | -11.7 | -23.2 | 7.0   | -60.6 |
|  | 1 | -                 | 9.01  | HF/3-21G         | 65.2  | -29.5 | -17.2 | 29.1  | 55.3  |
|  | 0 | -                 | 9.13  | HF/3-21G         | -45.6 | -20.3 | -22.5 | 12.5  | -69.9 |
|  | 0 | -                 | 11.54 | HF/3-21G         | 18.1  | -3.0  | -9.5  | 4.1   | 11.2  |
|  | 0 | -                 | 8.16  | HF/3-21G         | -47.4 | -21.2 | -27.7 | 11.4  | -77.8 |
|  | 0 | -                 | 9.36  | HF/3-21G         | 52.1  | -21.4 | -17.8 | 27.0  | 45.0  |

**Table S-6:** Interaction and lattice energy calculation of **3**.

|  | N | Symop             | R     | Electron Density | E_ele  | E_pol | E_dis | E_rep | E_tot  |
|--|---|-------------------|-------|------------------|--------|-------|-------|-------|--------|
|  | 2 | x, y, z           | 14.23 | HF/3-21G         | -19.1  | -11.9 | -11.1 | 0.0   | -37.2  |
|  | 2 | x+1/2, -y+1/2, -z | 9.64  | HF/3-21G         | -21.2  | -8.2  | -9.4  | 1.0   | -34.6  |
|  | 2 | -x+1/2, y+1/2, z  | 8.69  | HF/3-21G         | -19.8  | -20.1 | -64.0 | 31.7  | -65.2  |
|  | 1 | -x, -y, -z        | 12.48 | HF/3-21G         | -6.4   | -2.8  | -15.3 | 0.0   | -22.2  |
|  | 2 | -x, y+1/2, -z+1/2 | 9.49  | HF/3-21G         | -43.9  | -37.1 | -38.5 | 18.7  | -88.3  |
|  | 2 | -x+1/2, y+1/2, z  | 11.04 | HF/3-21G         | -10.1  | -28.1 | -12.3 | 7.4   | -33.7  |
|  | 1 | -x, -y, -z        | 6.85  | HF/3-21G         | -167.6 | -87.0 | -96.7 | 86.5  | -244.4 |
|  | 2 | x+1/2, -y+1/2, -z | 13.65 | HF/3-21G         | -90.5  | -45.2 | -13.4 | 0.0   | -133.7 |
|  | 2 | x+1/2, y, -z+1/2  | 9.03  | HF/3-21G         | 32.8   | -7.2  | -39.5 | 20.1  | 9.5    |

1. D. Yun, J. B. Chae, H. So, H. Lee, K.-T. Kim and C. Kim, Sensing of zinc ions and sulfide using a highly practical and water-soluble fluorescent sensor: applications in test kits and zebrafish, *New J. Chem.*, 2020, **44**, 442-449.
2. S. Enbanathan, S. Munusamy, D. Jothi, S. Manojkumar, S. Manickam and S. K. Iyer, Zinc ion detection using a benzothiazole-based highly selective fluorescence "turn-on" chemosensor and its real-time application, *RSC Adv.*, 2022, **12**, 27839-27845.
3. B. Das, M. Dolai, A. Dhara, S. Mabhai, A. Jana, S. Dey and A. Misra, Acetate ion augmented fluorescence sensing of Zn<sup>2+</sup> by Salen-based probe, AIE character, and application for picric acid detection, *Anal. Sci. Adv.*, 2021, **2**, 447-463.
4. X.-J. Bai, J. Ren, J. Zhou and Z.-B. Song, A 'turn-on' fluorescent chemosensor for the detection of Zn<sup>2+</sup> ion based on 2-(quinolin-2-yl) quinazolin-4 (3 H)-one, *Heterocyclic Commun.*, 2018, **24**, 135-139.
5. B. K. Rani and S. A. John, A highly selective turn-on fluorescent chemosensor for detecting zinc ions in living cells using symmetrical pyrene system, *J. Photochem. and Photobiol. A.*, 2021, **418**, 113372.
6. J. M. Jung, J. J. Lee, E. Nam, M. H. Lim, C. Kim and R. G. Harrison, A zinc fluorescent sensor used to detect mercury (II) and hydrosulfide, *SAA*, 2017, **178**, 203-211.
